# Subcellular localisation and interactions among rubber particle proteins from *Hevea brasiliensis*

Daniel Brown<sup>1</sup>, Mistianne Feeney<sup>1</sup>, Mathin Hamadi<sup>2</sup>, Chiara Lonoce<sup>1,§</sup>, Roslinda Sajari<sup>3</sup>, Alessandra Di Cola<sup>2,€</sup>, Lorenzo Frigerio<sup>1,€</sup>

## SUPPLEMENTARY DATA

### **Supplementary Figure S1. The cytosolic localization of CPT6 is independent of the position of the YFP tag**

*N. benthamiana* leaves were agroinfiltrated with the indicated constructs and leaf sectors were imaged after 3 days. Scale bars: 20  $\mu\text{m}$

### **Supplementary Figure S2. Individual and combined expression of YFP-CPT6 and REF-mCherry**

*N. benthamiana* leaves were agroinfiltrated with the indicated constructs and leaf sectors were imaged after 3 days. A-C: expression of YFP-CPT6 alone does not result in detectable signal in the mCherry channel. D-F expression of REF-mCherry alone does not result in detectable signal in the YFP channel. G-I: YFP-CPT6 and REF-mCherry do not colocalise, with REF labelling the nuclear envelope and CPT6 labelling the nucleoplasm. Scale bars: 10  $\mu\text{m}$  (A-C, D-F) and 5  $\mu\text{m}$  (G-I).

### **Supplementary Figure S3. Individual and combined expression of GFP-SRPP and YFP-CPT6**

*N. benthamiana* leaves were agroinfiltrated with the indicated constructs and leaf sectors were imaged after 3 days. A-C: expression of YFP-CPT6 alone does not result in detectable signal in the GFP channel. D-F expression of GFP-SRPP alone does not result in detectable signal in the YFP channel. G-I: YFP-CPT6 and GFP-SRPP both label the nuclear envelope, indicating colocalisation in the endoplasmic reticulum. Scale bars: 10  $\mu\text{m}$ .

### **Supplementary Figure S4. TOPCONS topology predictions for HRBP and its orthologues NgBR, TbRTA and LEW1.**

**Supplementary Figure S5. Immunoblots of single rubber particle proteins expressed in *N. benthamiana*. A:** RFP fusions, detected with anti RFP. **B:** GFP fusions, detected with anti GFP.

**Supplementary Table 1.** Primers used in this study.

**Supplementary Table 2.** Constructs generated in this study.

# Supplementary Fig. S1

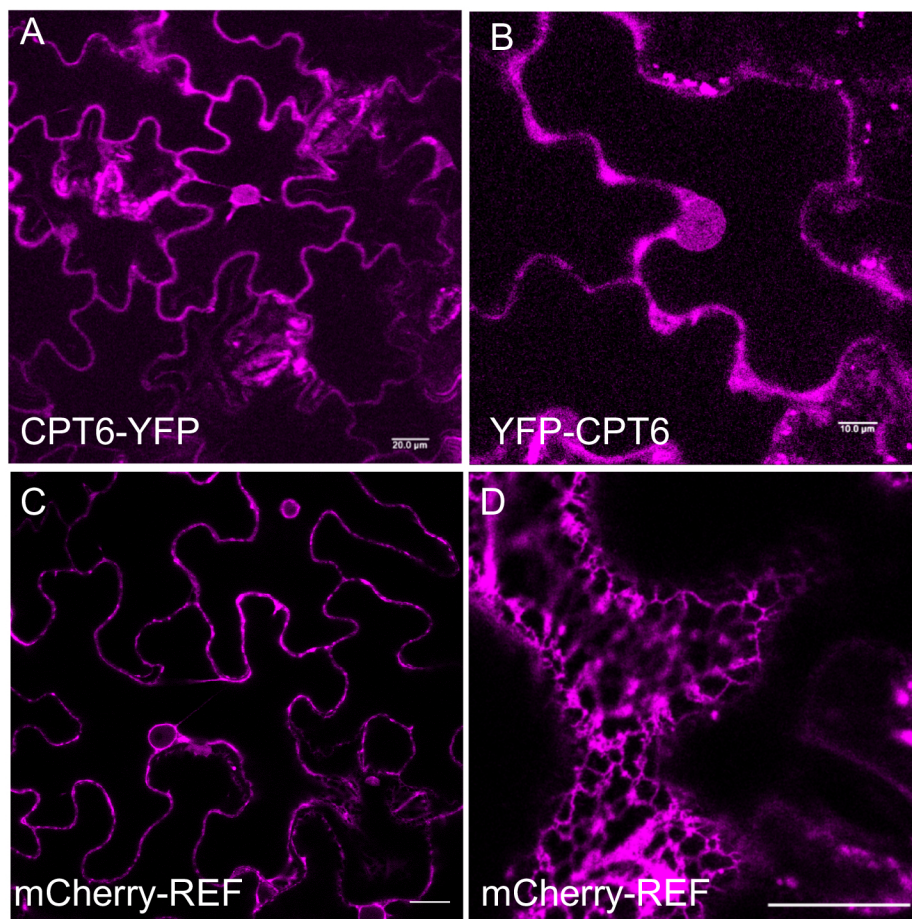

# Supplementary Fig. S2

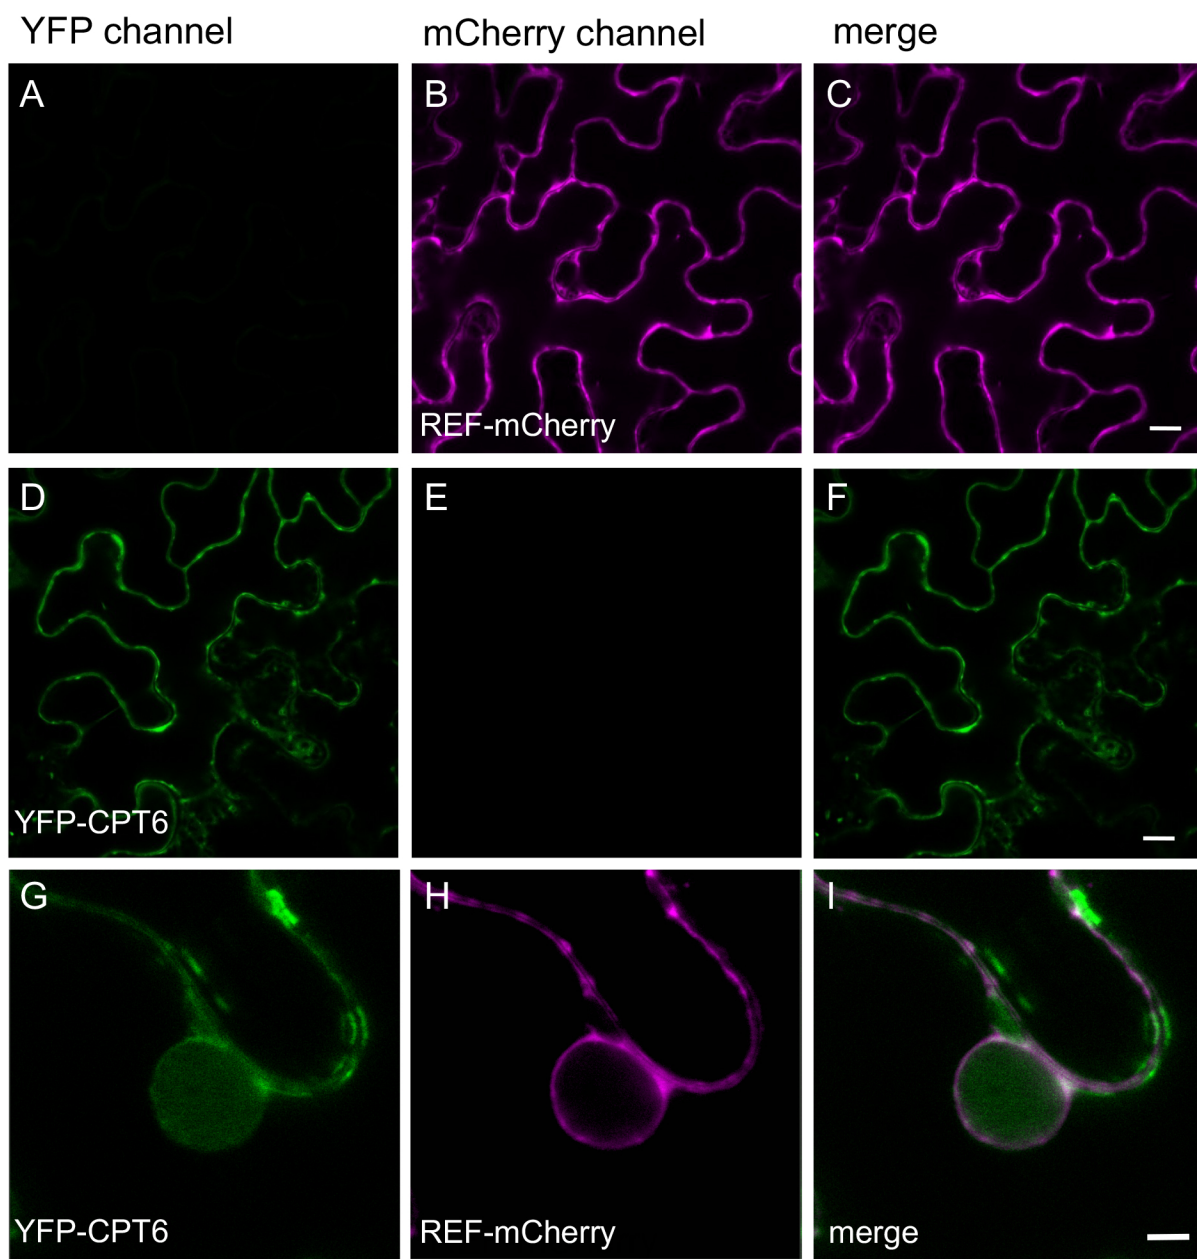

Supplementary Fig. S3

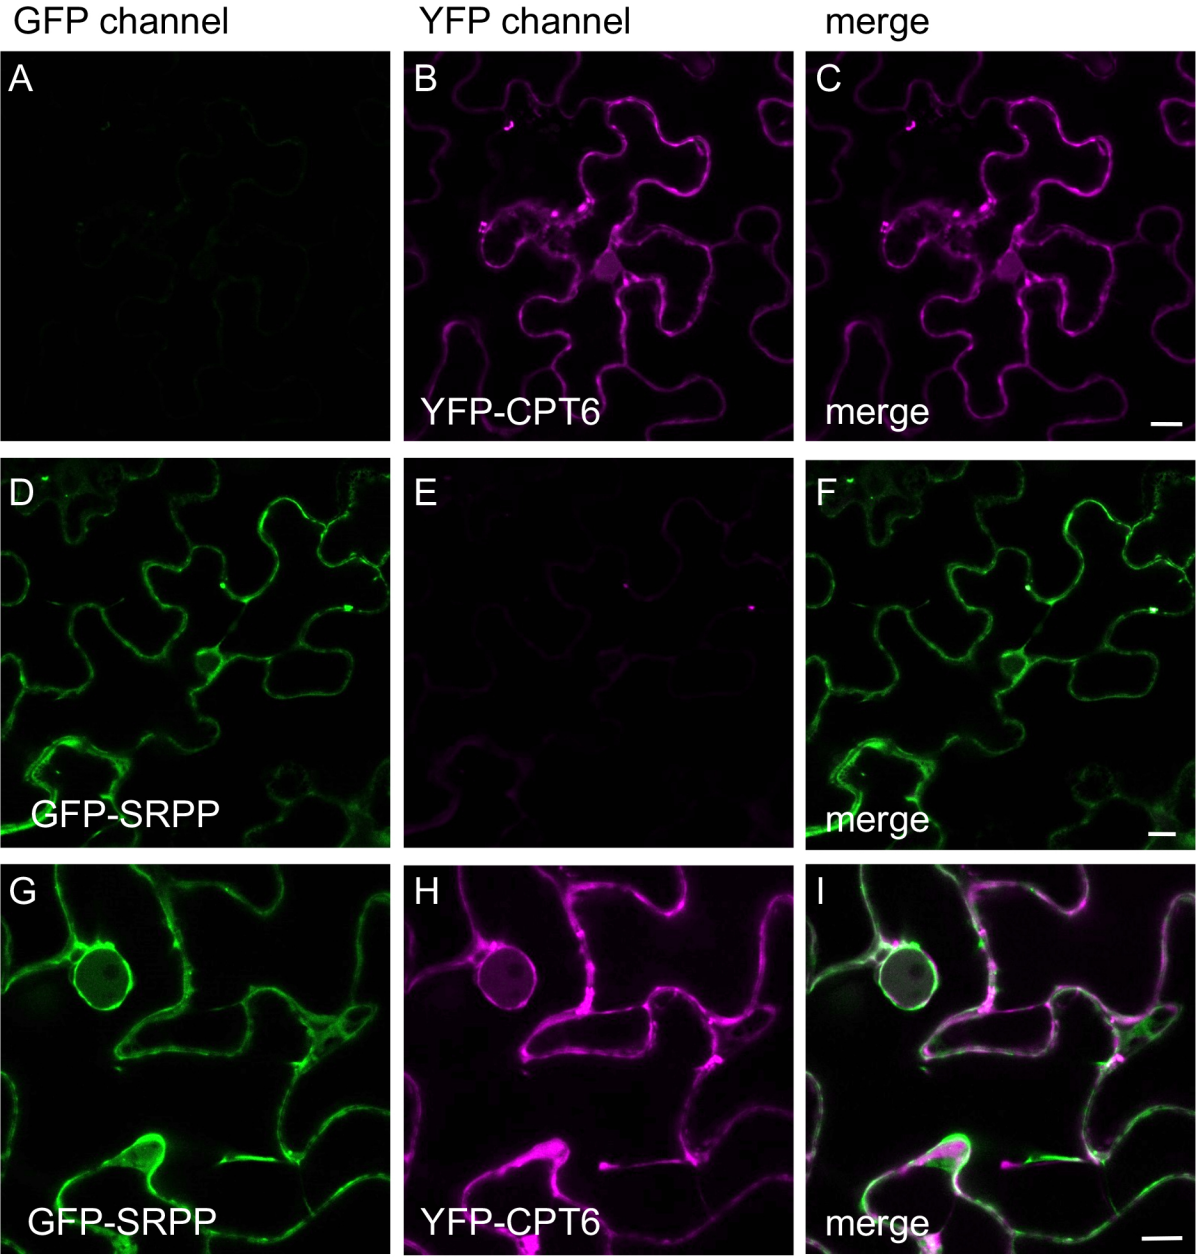

# Supplementary Fig. S4

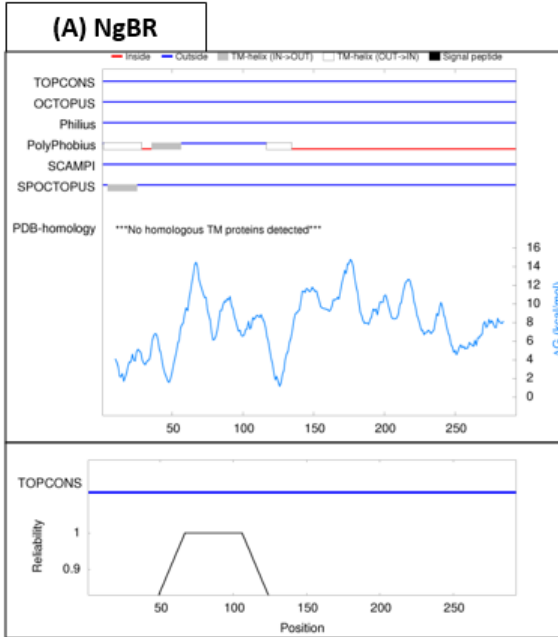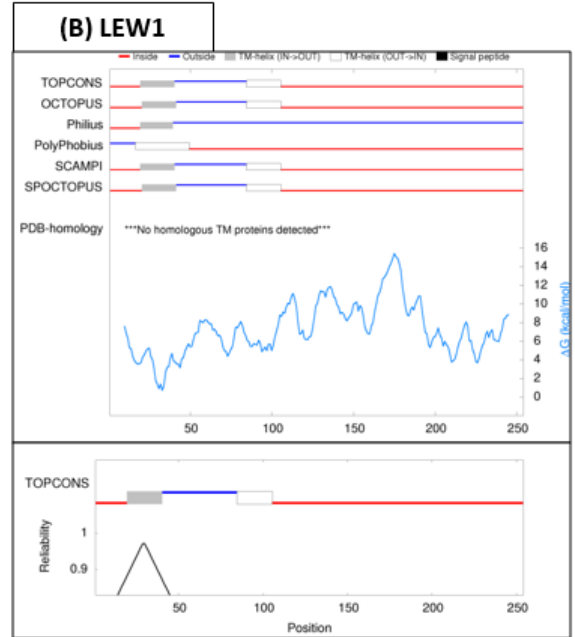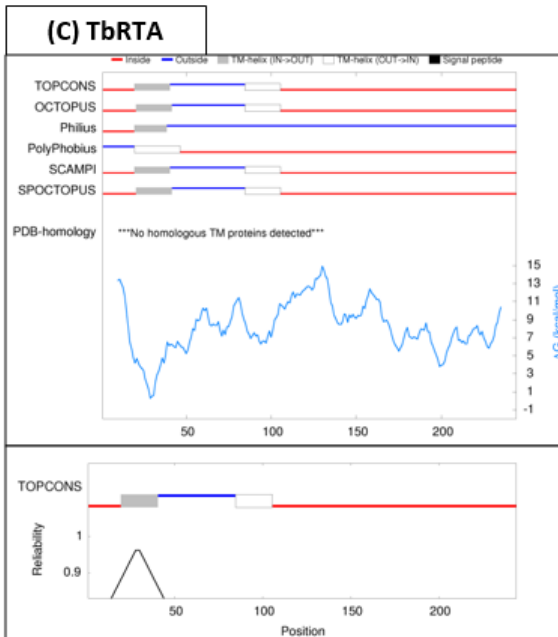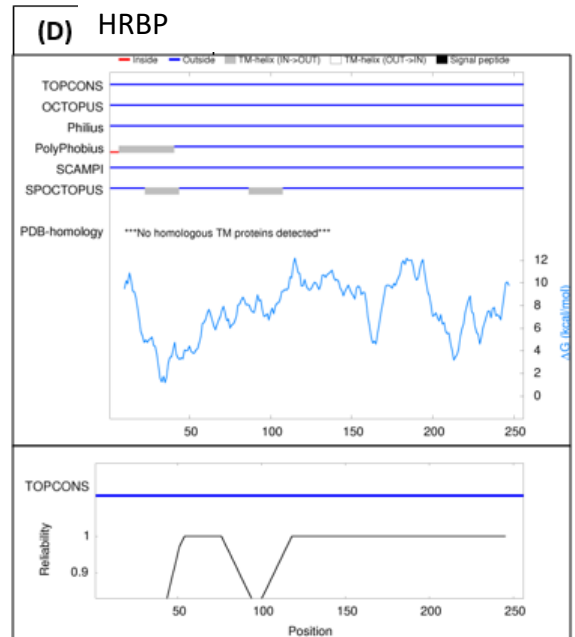

# Supplementary Fig. S5

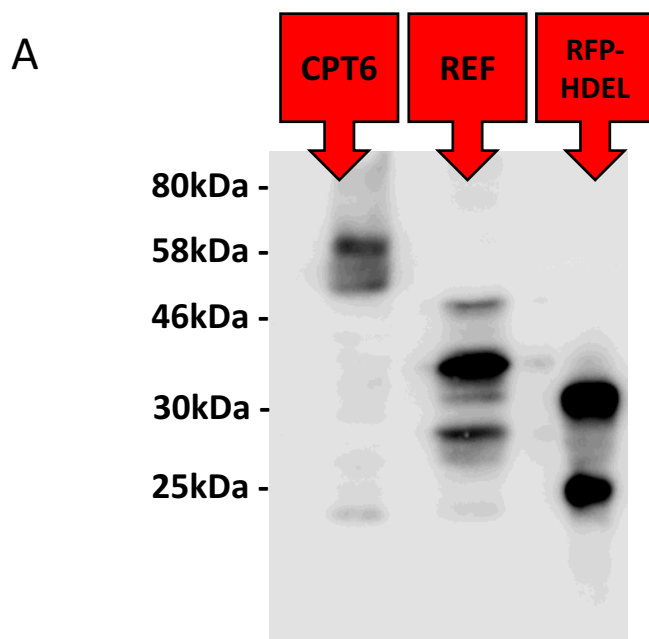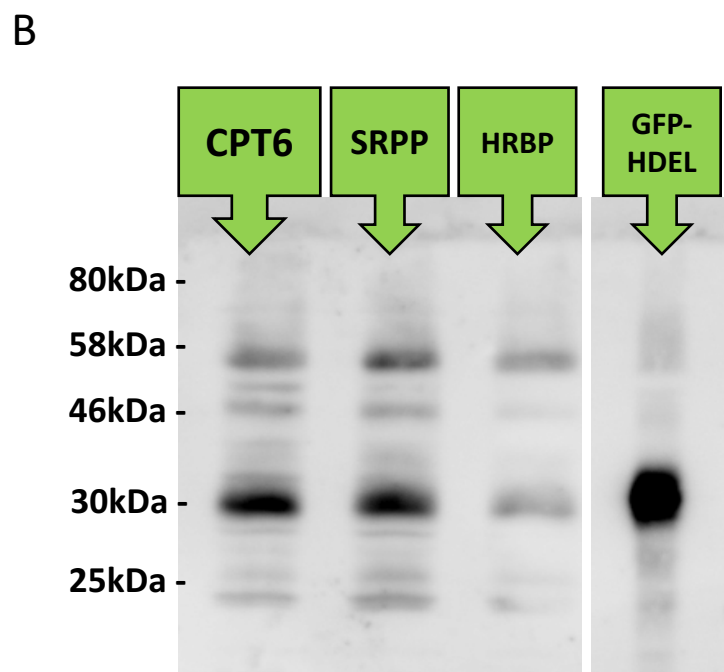



Supplementary Table 1

List of oligonucleotides used for cloning

| <u>Construct</u> | <u>Primer</u>      | <u>Sequence 5' - 3'</u>                           |
|------------------|--------------------|---------------------------------------------------|
| P                | <i>Xba</i> I FWD   | CTATAGCTAGACCTAAAATCATGACC                        |
|                  | CPT6...YFP RVS     | CTCCTCGCCCTTGCTGCCCATTTTTAAGTATTCCTTATGTTTC       |
|                  | CPT6...YFP FWD     | GAAACATAAGGAATACTTAAAAATGGGCAGCAAGGGCGAGGAG       |
|                  | <i>Sac</i> I RVS   | CTATAGCTAGACCTAAAATCATGACC                        |
| 35S:YFP-CPT6     | <i>Xba</i> I FWD   | CAGATATCTAGAATGGGCAGCAAGGGCGAGGAGC                |
|                  | YFP...CPT6 RVS     | CTCACCGTTGTATAATTCCATGATCACCTTGTACAGCTCGTC        |
|                  | YFP...CPT6 FWD     | GACGAGCTGTACAAGGTGATCATGGAATTATAACAACGGTGAG       |
|                  | <i>Sac</i> I RVS   | CAGATATCTAGAATGGGCAGCAAGGGCGAGGAGC                |
| 35S:CPT6-mCherry | <i>Xba</i> I FWD   | CTATAGCTAGACCTAAAATCATGACC                        |
|                  | CPT6...mCherry RVS | GTCCTCCTCGCCCTTGCTCACCATCTCCTCGCCCTTGCTGCCCAT     |
|                  | CPT6...mCherry FWD | GAAACATAAGGAATACTTAAAAATGGTGAGCAAGGGCGAGGAGGAC    |
|                  | <i>Sac</i> I RVS   | CAGATATCTAGAATGGGCAGCAAGGGCGAGGAGC                |
| 35S:mCherry-CPT6 | <i>Xba</i> I FWD   | CAGATATCTAGAATGGTGAGCAAGGGCGAGGAGGAC              |
|                  | mCherry...CPT6 RVS | CTCACCGTTGTATAATTCCATCTTGTACAGCTCGTCCATGCCGC      |
|                  | mCherry...CPT6 FWD | GCGGCATGGACGAGCTGTACAAGATGGAATTATAACAACGGTGAG     |
|                  | <i>Sac</i> I RVS   | CAGATAGGATCCTTACTTGTACAGCTCGTCCATGCCG             |
| 35S:SRPP-GFP     | <i>Xba</i> I FWD   | CAGATATCTAGAATGGCCGAAGGCGA                        |
|                  | SRPP...GFP RVS     | CTCCTCGCCCTTGCTCACCATGCTGGAAACAAGTGGCATG          |
|                  | SRPP...GFP FWD     | CAATCCATGCCACTTGTTCAGCATGGTGAGCAAGGGCGAGGAGCTGTTC |
|                  | <i>Sac</i> I RVS   | CAGATAGAGCTCTTACTTGTACAGCTCGTCCATGC               |
| 35S:GFP-SRPP     | <i>Xba</i> I FWD   | CAGATATCTAGAATGGTGAGCAAGGGCGAGGAGCTG              |
|                  | GFP...SRPP RVS     | CGTTTCCTTCGCCTTCGGCCATCTTGTACAGCTCGTCCATGCCGAG    |

|                           |                           |                                                 |
|---------------------------|---------------------------|-------------------------------------------------|
|                           | GFP...SRPP FWD            | CTCGGCATGGACGAGCTGTACAAGATGGCCGAAGGCGAAGGAAACG  |
|                           | <i>SacI</i> RVS           | CAGATAGAGCTCTCAGCTGGAAACAA                      |
| 35S:REF-mCherry           | <i>XbaI</i> FWD           | CAGATATCTAGAATGGCTGAAGACGAAGACAACCAAC           |
|                           | REF...mCherry RVS         | GTCCTCCTCGCCCTTGCTCACCATATTCTCTCCATAAAACACCTTAG |
|                           | REF...mCherry FWD         | CTAAGGTGTTTTATGGAGAGAATATGGTGAGCAAGGGCGAGGAGGAC |
|                           | <i>BamHI</i> RVS          | CAGATAGGATCCTTACTTGTACAGCTCGTCCATGCCG           |
| 35S:mCherry-REF           | <i>XbaI</i> FWD           | CAGATATCTAGAATGGTGAGCAAGGGCGAGGAGGAC            |
|                           | mCherry...REF RVS         | GGTTGTCTTCGTCTTCAGCCATCTTGTACAGCTCGTCCATGCCGC   |
|                           | mCherry...REF FWD         | GCGGCATGGACGAGCTGTACAAGATGGCTGAAGACGAAGACAACC   |
|                           | <i>BamHI</i> RVS          | CAGATAGGATCCTCAATTCTCTCCATAAAACACCTTAG          |
| 35S:HRBP-CFP              | <i>XbaI</i> FWD           | CAGATATCTAGAATGGATTTGAAACCTGGAG                 |
|                           | HRBP...CFP RVS            | CTCCTCGCCCTTGCTCACCATCTAACCATAATTTTGCTGCAC      |
|                           | HRBP...CFP FWD            | GTGCAGCAAATTATGGTTAGATGGTGAGCAAGGGCGAGGAG       |
|                           | <i>SacI</i> RVS           | CAGATAGAGCTCCTAACCATAATTTTGCTGCAC               |
| 35S:CFP-HRBP              | <i>XbaI</i> FWD           | CAGATATCTAGAATGGTGAGCAAGGGCGAG                  |
|                           | CFP...HRBP RVS            | CTCCAGGTTTCAAATCCATCTTGTACAGCTCGTCCATGCCG       |
|                           | CFP...HRBP FWD            | CGGCATGGACGAGCTGTACAAGATGGATTTGAAACCTGGAG       |
|                           | <i>SacI</i> RVS           | CAGATAGAGCTCTTACTTGTACAGCTCGTCC                 |
| 35S:HRBP $\Delta$ TM1-CFP | $\Delta$ TM1 FWD          | AAACGCTATGGAGCCCTC                              |
|                           | $\Delta$ TM1 RVS          | ATGTAGAGTACGCCACAG                              |
| 35S:HRBP $\Delta$ TM2-CFP | $\Delta$ TM2 RVS          | GGAGTTCTCAAGACAAACAAG                           |
|                           | $\Delta$ TM2 FWD          | AACTTTAGAAATTTGGTAAGCTTC                        |
| CPT6 Gateway Entry        | attb1 FWD                 | AAAAAAGCAGGCTTCATGGAATTATACAACGGTGAGAG          |
|                           | attb2 RVS                 | CAAGAAAGCTGGGTCTTTTAAGTATTCCTTATGTTTC           |
|                           | attb2 RVS (no stop codon) | CAAGAAAGCTGGGTCTCATTTTAAGTATTCCTTATGTTTC        |



|                                    |                           |                                          |
|------------------------------------|---------------------------|------------------------------------------|
| SRPP Gateway Entry                 | attb1 FWD                 | AAAAAAGCAGGCTTCATGGCCGAAGGCG             |
|                                    | attb2 RVS                 | CAAGAAAGCTGGGTCTCAGCTGGAAACAAG           |
|                                    | attb2 RVS (no stop codon) | CAAGAAAGCTGGGTCTGCTGGAAACAAG             |
| REF Gateway Entry                  | attb1 FWD                 | AAAAAAGCAGGCTTCATGGCTGAAGACGAAGACAACCAAC |
|                                    | attb2 RVS                 | CAAGAAAGCTGGGTCTTACTTGTACAGCTCGTCCATGCCG |
|                                    | attb2 RVS (no stop codon) | CAAGAAAGCTGGGTCTTGTACAGCTCGTCCATGCCG     |
| HRBP Gateway Entry                 | attb1 FWD                 | AAAAAAGCAGGCTTCATGGATTGAAACCTG           |
|                                    | attb2 RVS                 | CAAGAAAGCTGGGTCTCATGTACCATAATTTTG        |
|                                    | attb2 RVS (no stop codon) | CAAGAAAGCTGGGTCTGTACCATAATTTTG           |
| Gateway att<br>(secondary) primers | FWD                       | GGGGACAAGTTTGTACAAAAAAGCAGGCT            |
|                                    | RVS                       | GGGGACCACTTTGTACAAGAAAGCTGGGT            |

## Supplementary Table 2

### List of constructs generated during this work

| Construct                 | Vector        | Description                                                                          |
|---------------------------|---------------|--------------------------------------------------------------------------------------|
| 35S:CPT6-YFP              | pGreenII-0029 | Full length genomic DNA of HRT2 fused in frame with a YFP tag at the C-terminus      |
| 35S:YFP-CPT6              | pGreenII-0029 | Full length genomic DNA of HRT fused in frame with a YFP tag at the N-terminus       |
| 35S:CPT6-mCherry          | pGreenII-0029 | Full length genomic DNA of HRT2 fused in frame with an mCherry tag at the C-terminus |
| 35S:mCherry-CPT6          | pGreenII-0029 | Full length genomic DNA of HRT2 fused in frame with an mCherry tag at the N-terminus |
| 35S:SRPP-GFP              | pGreenII-0029 | Full length cDNA of SRPP fused in frame with an GFP tag at the C-terminus            |
| 35S:GFP-SRPP              | pGreenII-0029 | Full length cDNA of SRPP fused in frame with an GFP tag at the N-terminus            |
| 35S:REF-mCherry           | pGreenII-0029 | Full length cDNA of REF fused in frame with an mCherry tag at the C-terminus         |
| 35S:mCherry-REF           | pGreenII-0029 | Full length cDNA of REF fused in frame with an mCherry tag at the N-terminus         |
| 35S:HRBP                  | pGreenII-0029 | Full length cDNA of HRBP                                                             |
| 35S:HRBP-CFP              | pGreenII-0029 | Full length cDNA of HRBP fused in frame with a CFP tag at the C-terminus             |
| 35S:CFP-HRBP              | pGreenII-0029 | Full length cDNA of HRBP fused in frame with a CFP tag at the N-terminus             |
| 35S:HRBP $\Delta$ TM1-CFP | pGreenII-0029 | A 35S:HRBP-CFP mutant lacking residues 32-58                                         |

|                           |               |                                                                        |
|---------------------------|---------------|------------------------------------------------------------------------|
| 35S:HRBP $\Delta$ TM2-CFP | pGreenII-0029 | A 35S:HRBP-CFP mutant lacking residues 87-108                          |
| 35S:HRBP-RFP              | pGWB654       | Full length cDNA of HRBP with an RFP tag in frame with the c' terminus |
